# Supplementary material for: Pathological Relevance of Post-translationally Modified Alpha-Synuclein (pSer87, pSer129, nTyr39) in Idiopathic Parkinson’s Disease and Multiple System Atrophy
Source: Preprints.org preprint supplement (doi:10.20944/preprints202201.0174.v1), 2022-01-12
Supplement: Supplementary file 1 [file supplementary]

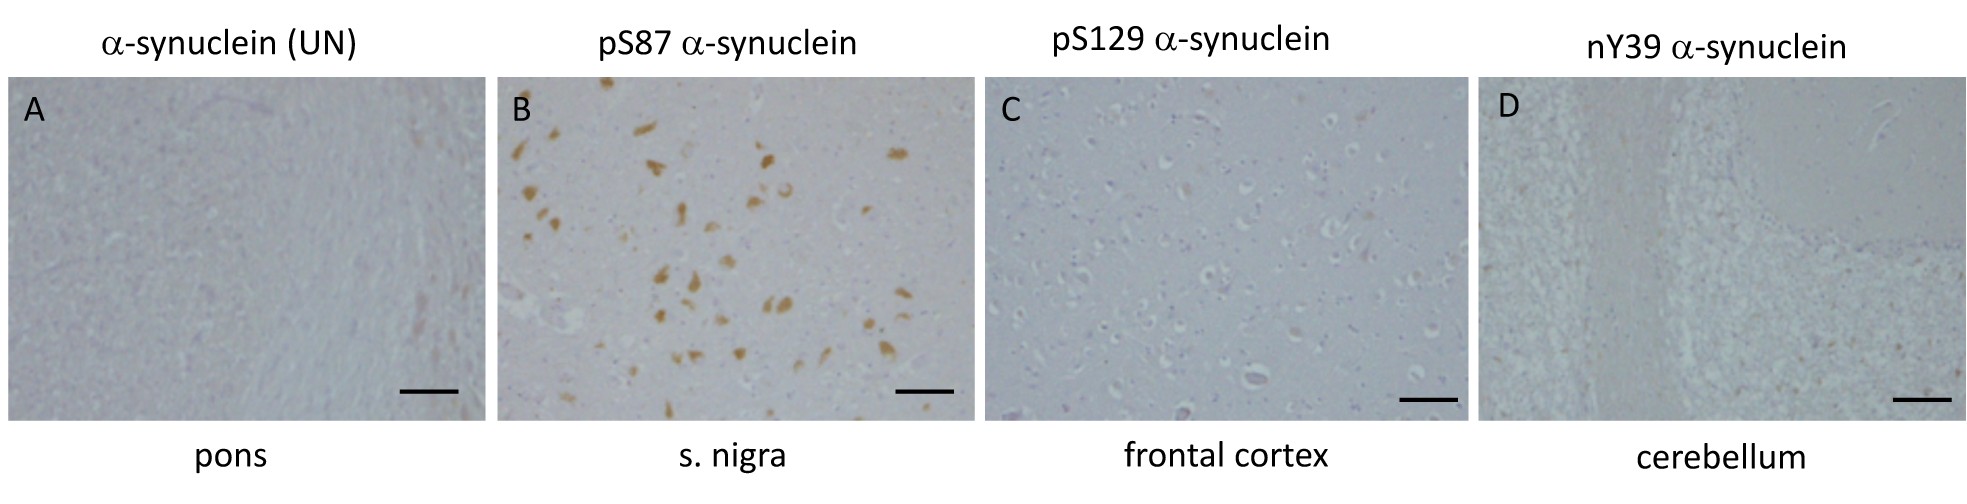


**Figure S1.** Representative immunohistochemistry illustrations of neurologically normal control cases showing no abnormal -synuclein deposits when treated with various -synuclein antibodies. Scale bar 50m in all.


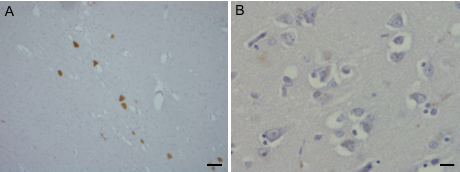


**Figure S2.** Immunohistochemistry of brain sections from IPD cases showing no appreciable staining within PD nigra (A) or frontal cortex (B) when primary antibodies were omitted but treated with anti-rabbit and anti-mouse secondaries respectively. Scale bar 60m in A, 15m in B.
